# Supplementary material for: Association between Cybervictimization and Sleep Quality in a National Sample of U.S. Adolescents: Examining the Moderating Role of In-Person and Social Media Emotional Support
Source: Research Square preprint supplement (doi:10.21203/rs.3.rs-8502717/v1), 2026-01-30
Supplement: Supplementary file 1 [file 1799843c164fe5077139839b.xlsx]

## Sheet: Sheet1
Predictor	Estimate	95% CI	t value	p value	N
Cybervictimization	2.741	[1.577, 3.904]	4.626	<.001	686
In Person Peer Emotional Support	-0.169	[-0.229, -0.109]	-5.551	<.001	683
In Person Parent Emotional Support	-0.222	[-0.274, -0.170]	-8.377	<.001	685
SM-based emotional support	-0.068	[-0.148, 0.012]	-1.659	0.0976	688
Table 2 Bivariable association between Cybervictimization and predictors on Sleep quality
CI = Confidence Interval
