# Supplementary material for: Association between Cybervictimization and Sleep Quality in a National Sample of U.S. Adolescents: Examining the Moderating Role of In-Person and Social Media Emotional Support
Source: Research Square preprint supplement (doi:10.21203/rs.3.rs-8502717/v1), 2026-01-30
Supplement: Supplementary file 2 [file 4d187afbccdc49f7bbfc08ff.xlsx]

## Sheet: Sheet1
	In Person Peer Emotional Support (N=676)				In Person Parent Emotional Support (N=677)				SM-based emotional support (N=679)
Variables	Estimate	95% CI	t value	p value	Estimate	95% CI	t value	p value	Estimate	95% CI	t value	p value
Cybervictimization	-2.03	[-6.329, 2.269]	-0.93	0.3541	0.871	[-3.762, 5.503]	0.37	0.7122	1.785	[-5.697, 9.268]	0.47	0.6395
Moderator	-0.291	[-0.456, -0.127]	-3.47	<0.001	-0.233	[-0.393, -0.074]	-2.88	0.0041	-0.116	[-0.372, 0.140]	-0.89	0.3733
Interaction	0.119	[0.016, 0.222]	2.27	0.0236	0.047	[-0.056, 0.149]	0.9	0.3706	0.028	[-0.148, 0.203]	0.31	0.7564
Covariates
Age	0.139	[-0.371, 0.649]	0.53	0.5931	0.101	[-0.403, 0.606]	0.39	0.693	0.178	[-0.338, 0.694]	0.68	0.4989
Birth Sex
Female (Reference)
Male	-3.927	[-6.282, -1.572]	-3.27	0.0011	-3.625	[-5.947, -1.304]	-3.07	0.0023	-4.424	[-6.787, -2.061]	-3.68	<0.001
Not Sure / Prefer not to answer	1.815	[-5.319, 8.948]	0.5	0.6176	2.072	[-4.977, 9.121]	0.58	0.564	1.958	[-5.266, 9.183]	0.53	0.5948
Gender Identity
Female (Reference)
Male	1.733	[-0.701, 4.167]	1.4	0.1626	1.976	[-0.407, 4.360]	1.63	0.104	2.267	[-0.178, 4.713]	1.82	0.0692
Non-binary	1.595	[-0.662, 3.852]	1.39	0.1658	1.311	[-0.926, 3.549]	1.15	0.2501	1.858	[-0.420, 4.136]	1.6	0.1098
Different Term	1.195	[-2.181, 4.571]	0.7	0.4873	1.499	[-1.822, 4.820]	0.89	0.3757	2.001	[-1.395, 5.396]	1.16	0.2477
Transgender	1.669	[-1.799, 5.137]	0.95	0.345	1.894	[-1.520, 5.308]	1.09	0.2764	2.587	[-0.899, 6.073]	1.46	0.1456
Not Sure/ Prefer not to answer	2.586	[-1.870, 7.041]	1.14	0.2549	2.987	[-1.408, 7.382]	1.33	0.1825	3.179	[-1.334, 7.691]	1.38	0.1671
Sexual Orientation
Bisexual (Reference)
Heterosexual	-1.547	[-3.753, 0.659]	-1.38	0.169	-0.784	[-2.990, 1.421]	-0.7	0.4854	-1.724	[-3.955, 0.507]	-1.52	0.1297
Lesbian	-1.081	[-3.524, 1.361]	-0.87	0.3849	-0.7	[-3.119, 1.719]	-0.57	0.5702	-0.932	[-3.393, 1.530]	-0.74	0.4576
Queer	0.761	[-1.705, 3.227]	0.61	0.5447	0.756	[-1.683, 3.195]	0.61	0.5429	0.466	[-2.028, 2.961]	0.37	0.7136
Pansexual	2.652	[-0.408, 5.712]	1.7	0.0893	2.403	[-0.616, 5.422]	1.56	0.1186	2.459	[-0.635, 5.553]	1.56	0.1191
Gay	0.976	[-2.579, 4.530]	0.54	0.5901	1.033	[-2.490, 4.556]	0.58	0.5648	0.833	[-2.766, 4.433]	0.45	0.6496
Asexual	1.861	[-1.479, 5.201]	1.09	0.2743	2.31	[-0.994, 5.614]	1.37	0.1703	2.22	[-1.157, 5.596]	1.29	0.1973
Same-gender loving / Other	0.257	[-4.218, 4.731]	0.11	0.9103	0.998	[-3.322, 5.319]	0.45	0.6502	0.909	[-3.515, 5.334]	0.4	0.6866
Rural
Non Rural (Reference)
Rural	2.06	[-0.197, 4.317]	1.79	0.0736	2.021	[-0.218, 4.259]	1.77	0.0768	2.184	[-0.102, 4.471]	1.88	0.0611
Race
White (Reference)
Black	-0.535	[-2.932, 1.862]	-0.44	0.6612	-1.056	[-3.416, 1.304]	-0.88	0.38	-0.549	[-2.959, 1.861]	-0.45	0.655
Multiracial	0.368	[-1.929, 2.664]	0.31	0.7533	-0.11	[-2.386, 2.166]	-0.09	0.9244	0.373	[-1.951, 2.697]	0.31	0.7529
Asian	-1.097	[-3.469, 1.274]	-0.91	0.364	-2.088	[-4.455, 0.280]	-1.73	0.0838	-1.03	[-3.428, 1.369]	-0.84	0.3996
American Indian/Alaskan Native or Native Hawaiian/Other Pacific Islander	-2.872	[-8.677, 2.933]	-0.97	0.3316	-2.96	[-8.695, 2.775]	-1.01	0.3113	-1.959	[-7.841, 3.923]	-0.65	0.5133
Ethnicity
Not Latinx/Hispanic/Latino/a (Reference)
Latinx/Hispanic/Latino/a	0.566	[-1.379, 2.510]	0.57	0.568	0.455	[-1.462, 2.373]	0.47	0.6411	0.682	[-1.279, 2.644]	0.68	0.4947
Living Situation
Family (Reference)
Friends	0.415	[-1.404, 2.234]	0.45	0.6543	0.277	[-1.518, 2.071]	0.3	0.7622	-0.189	[-2.012, 1.635]	-0.2	0.839
Alone	0.721	[-1.814, 3.256]	0.56	0.5765	0.416	[-2.085, 2.917]	0.33	0.744	0.234	[-2.329, 2.798]	0.18	0.8576
Spouse / Significant Other	1.103	[-2.207, 4.413]	0.65	0.5131	0.492	[-2.782, 3.767]	0.3	0.7678	0.758	[-2.596, 4.112]	0.44	0.6573
Other	-0.363	[-7.041, 6.314]	-0.11	0.9149	-1.75	[-8.368, 4.868]	-0.52	0.6037	-1.094	[-7.862, 5.673]	-0.32	0.751
Socioeconomic Status
Only worry about extras (Reference)
Not enough to get by	1.302	[-1.914, 4.518]	0.8	0.4269	0.292	[-2.897, 3.481]	0.18	0.8572	1.162	[-2.095, 4.419]	0.7	0.4837
Just enough to get by	1.614	[-0.084, 3.312]	1.87	0.0624	0.827	[-0.868, 2.522]	0.96	0.3384	1.54	[-0.175, 3.255]	1.76	0.0783
Never worry about money	-2.101	[-4.217, 0.015]	-1.95	0.0516	-1.756	[-3.848, 0.335]	-1.65	0.0997	-2.493	[-4.620, -0.366]	-2.3	0.0217
Table 4 Moderation associations between predictors and cybervictimization and sleep
CI = Confidence Interval
