# Supplementary material for: Association between Cybervictimization and Sleep Quality in a National Sample of U.S. Adolescents: Examining the Moderating Role of In-Person and Social Media Emotional Support
Source: Research Square preprint supplement (doi:10.21203/rs.3.rs-8502717/v1), 2026-01-30
Supplement: Supplementary file 3 [file f140589eb561e8f60317864b.xlsx]

## Sheet: Sheet1
Predictor	Estimate	95% CI	t value	p value	N
Cybervictimization	3.034	[1.766, 4.302]	4.7	<0.001	679
In Person Peer Emotional Support	-0.134	[-0.195, -0.072]	-4.28	<0.001	676
In Person Parent Emotional Support	-0.172	[-0.228, -0.115]	-5.93	<0.001	677
SM-based emotional support	-0.09	[-0.169, -0.010]	-2.21	0.0271	679
Table 3 Adjusted multivariable association between Cybervictimization and predictors on Sleep quality
CI = Confidence Interval
