# Supplementary material for: Association between Cybervictimization and Sleep Quality in a National Sample of U.S. Adolescents: Examining the Moderating Role of In-Person and Social Media Emotional Support
Source: Research Square preprint supplement (doi:10.21203/rs.3.rs-8502717/v1), 2026-01-30
Supplement: Supplementary file 4 [file f6765d4de96e5db30e4f7327.xlsx]

## Sheet: Sheet1
Independent Variable and Covariates	Whole Samplea
	(N=689)
Cybervictimization, M (SD)	1.54 (0.63)
Sleep Quality, M (SD)	59.68 (9.95)
Predictors
In Person Peer Emotional Support, M (SD)	42.4 (12.26)
In Person Parent Emotional Support, M (SD)	41.6 (13.71)
SM-based emotional support, M (SD)	42.86 (9.26)
Covariates
Age, y, M (SD)	19 (1.52)
Birth Sex, N (%)
Female	529 (76.8)
Male	152 (22.1)
Prefer not to answer	6 (0.9)
Not Sure	1 (0.1)
NA	1(0.1)
Gender Identity, N (%)
Female	323 (46.9)
Male	167 (24.2)
Non-binary	102 (14.8)
Different Term	39 (5.7)
Transgender	38 (5.5)
Not Sure	15 (2.2)
Prefer not to answer	4 (0.6)
NA	1 (0.1)
Sexual Orientation, N (%)
Bisexual	184 (26.7)
Heterosexual	158 (22.9)
Lesbian	99 (14.4)
Queer	95 (13.8)
Pansexual	50 (7.3)
Gay	40 (5.8)
Asexual	40 (5.8)
Other	19 (2.8)
Same-gender loving	3 (0.4)
NA	1 (0.1)
Rural, N (%)
No	609 (88.4)
Yes	80 (11.6)
Race, N (%)
White	423 (61.4)
Black	86 (12.5)
Multiracial	86 (12.5)
Asian	80 (11.6)
American Indian/Alaskan Native	10 (1.5)
Native Hawaiian/Other Pacific Islander	1 (0.1)
NA	3 (0.4)
Ethnicity, N (%)
Not Latinx/Hispanic/Latino/a	554 (80.4)
Latinx/Hispanic/Latino/a	133 (19.3)
NA	2 (0.03)
Living Situation, N (%)
Familyb	392 (56.9)
Friends/Roommates	179 (26)
Alone	71 (10.3)
Spouse/Significant Other	37 (5.4)
Other	10 (1.5)
Socioeconomic Status N (%)
Only worry about extras	269 (39)
Just enough to get by	251 (36.4)
Never worry about money	123 (17.9)
Not enough to get by	44 (6.4)
NA	2 (0.3)
Table 1 Participant Characteristics
